# Supplementary material
Source: PubMed Central journal article supplement (PMC2925264)

**Supplementary Figure 1:**

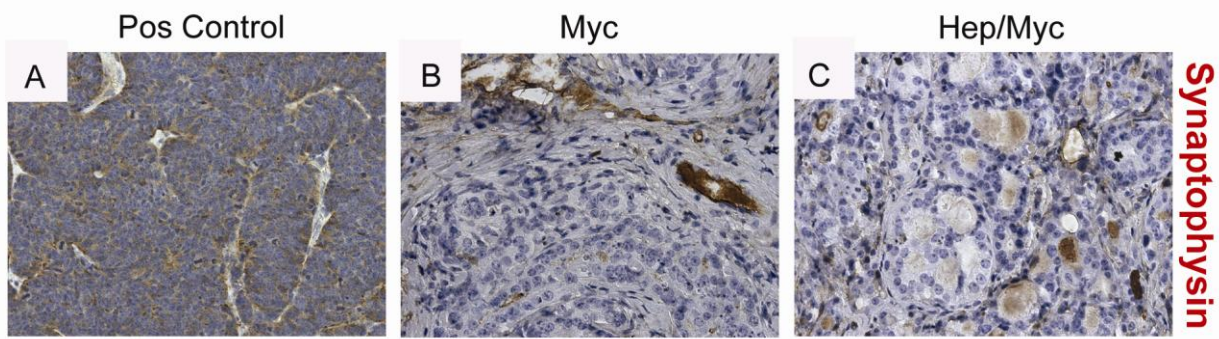

Supplement: NIHMS216660-supplement-S1fig.pdf [file NIHMS216660-supplement-S1fig.pdf]
